# Supplementary material for: Risk stratification of smoldering multiple myeloma incorporating revised IMWG diagnostic criteria
Source: PubMed Central journal article supplement (PMC5997745; doi:10.1038/s41408-018-0077-4), 2018-06-12
Supplement: 41408_2018_77_MOESM1_ESM.pdf [file 41408_2018_77_MOESM1_ESM.pdf]

**Comparison of the conventional Mayo Clinic model with the proposed risk stratification system using area under the curve (AUC) analysis (n=421).**

**2-year progression:** The proposed scoring system increases the area under the curve by 9% (from 62% to 71%), which is statistically significant ( $p = 0.004$ ).

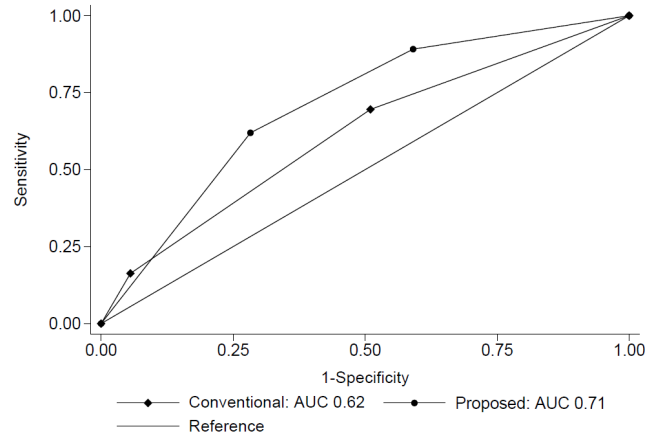

**3-year progression:** The proposed scoring system increases the area under the curve by 11% (from 62% to 73%), which is statistically significant ( $p < 0.001$ ).

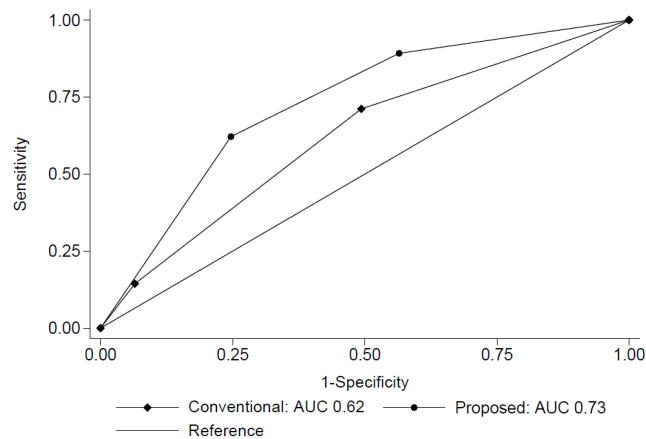

**5-year progression:** The proposed scoring system increases the area under the curve by 9% (from 68% to 77%), which is statistically significant ( $p = 0.010$ ).

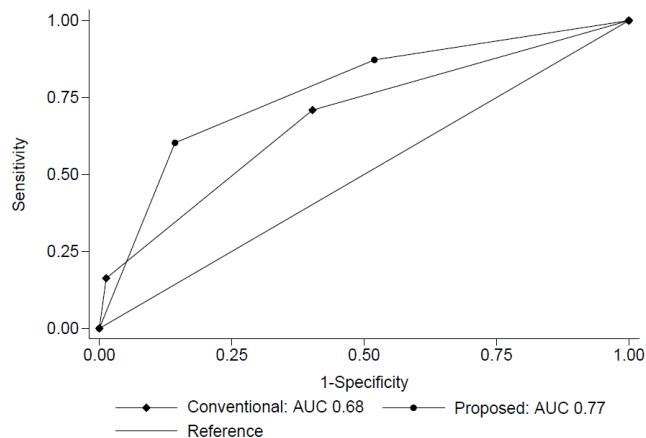

**Comparison of the conventional Mayo Clinic model with the proposed risk stratification system including cytogenetics using area under the curve (AUC) analysis (n=102).**

**2-year progression:** The proposed scoring system increases the area under the curve by 13% (from 61% to 74%), which is statistically significant ( $p = 0.018$ ).

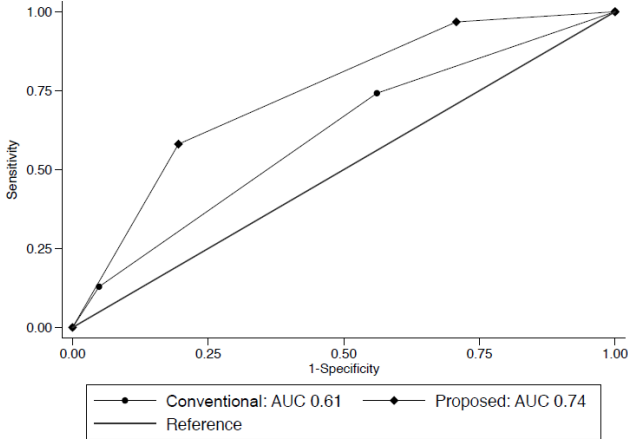

**3-year progression:** The proposed scoring system increases the area under the curve by 17% (from 58% to 75%), which is statistically significant ( $p = 0.004$ ).

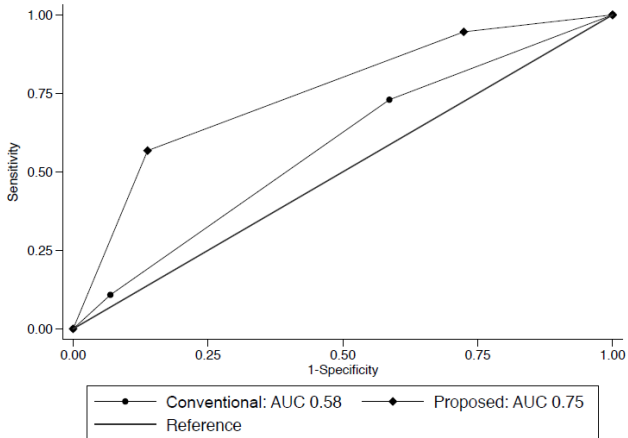

**5-year progression:** The proposed scoring system increases the area under the curve by 10% (from 70% to 80%), which is NOT statistically significant ( $p = 0.232$ ).

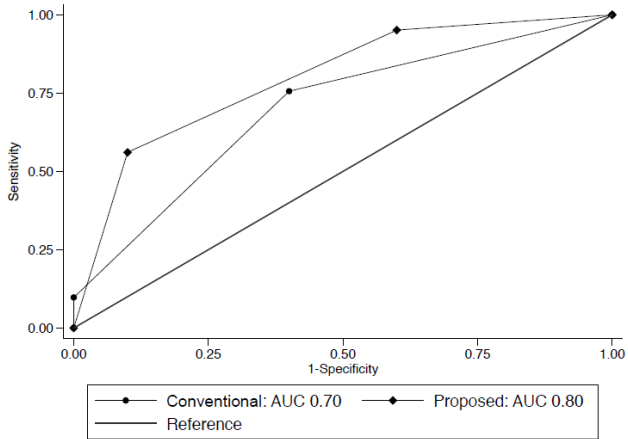

**Supplementary table- Comparison of categorization of patients using the conventional Mayo Clinic model and the proposed classification system incorporating individual risk factors.**

|                                                                     |                           | Distribution of patients according to the conventional Mayo Clinic risk stratification system incorporating BMPC, M-protein and FLCr |                            |                  |                                               |                                      |                                           |                                                              |    |
|---------------------------------------------------------------------|---------------------------|--------------------------------------------------------------------------------------------------------------------------------------|----------------------------|------------------|-----------------------------------------------|--------------------------------------|-------------------------------------------|--------------------------------------------------------------|----|
|                                                                     |                           | Low-risk (n=187)                                                                                                                     |                            |                  | Intermediate-risk (n=193)                     |                                      |                                           | High-risk (n=37)                                             |    |
|                                                                     |                           | BMPC ≥10%<br>(n=184)                                                                                                                 | M-protein ≥3 g/dL<br>(n=3) | FLCr ≥8<br>(n=1) | BMPC ≥10%<br>+<br>M-protein ≥3 g/dL<br>(n=27) | BMPC ≥10%<br>+<br>FLCr ≥8<br>(n=161) | M-protein ≥3g/dL<br>+<br>FLCr ≥8<br>(n=5) | BMPC ≥10%<br>+<br>M-protein ≥3g/dL<br>+<br>FLCr ≥8<br>(n=37) |    |
| Distribution of patients by the proposed risk stratification system | Low-risk (n=143)          | None (n=143)                                                                                                                         | 106                        | 0                | 0                                             | 0                                    | 37                                        | 0                                                            |    |
|                                                                     | Intermediate-risk (n=121) | BMPC>20% (n=23)                                                                                                                      | 19                         | 0                | 0                                             | 0                                    | 4                                         | 0                                                            |    |
|                                                                     |                           | M-protein>2 g/dL (n=63)                                                                                                              | 35                         | 3                | 0                                             | 9                                    | 13                                        | 3                                                            |    |
|                                                                     |                           | FLCr >20 (n=35)                                                                                                                      | 0                          | 0                | 0                                             | 0                                    | 35                                        | 0                                                            |    |
|                                                                     | High-risk (n=153)         | BMPC >20% + M-protein >2 g/dL (n=64)                                                                                                 | 23                         | 0                | 0                                             | 18                                   | 14                                        | 0                                                            | 9  |
|                                                                     |                           | BMPC >20% + FLCr >20 (n=21)                                                                                                          | 0                          | 0                | 0                                             | 0                                    | 21                                        | 0                                                            | 0  |
|                                                                     |                           | M-protein >2 g/dL + FLCr >20 (n=35)                                                                                                  | 0                          | 0                | 1                                             | 0                                    | 20                                        | 2                                                            | 12 |
|                                                                     |                           | BMPC >20% + M-protein >2 g/dL + FLCr >20 (n=33)                                                                                      | 0                          | 0                | 0                                             | 0                                    | 17                                        | 0                                                            | 16 |

BMPC indicates bone marrow plasma cell percentage; M-protein, monoclonal protein; FLCr, involved to uninvolved free light chain ratio.
